# Supplementary material
Source: ML conference proceedings conference paper supplement (https://proceedings.neurips.cc/paper_files/paper/2018/hash/34e157766f31db3d2099831d348a7933-Abstract.html)
Supplement: Supplementary file [file 34e157766f31db3d2099831d348a7933-Supplemental.zip]

# The Machine Learning Reproducibility Checklist (Version 1.0)

For all **algorithms** presented, check if you include:

- ☐ A clear description of the algorithm.
- ☐ An analysis of the complexity (time, space, sample size) of the algorithm.
- ☐ A link to a downloadable source code, including all dependencies.

For any **theoretical claim**, check if you include:

- ☐ A statement of the result.
- ☐ A clear explanation of any assumptions.
- ☐ A complete proof of the claim.

For all **figures** and **tables** that present empirical results, check if you include:

- ☐ A complete description of the data collection process, including sample size.
- ☒ A link to downloadable version of the dataset or simulation environment.
- ☐ An explanation of how samples were allocated for training / validation / testing.
- ☐ An explanation of any data that were excluded.
- ☐ The range of hyper-parameters considered, method to select the best hyper-parameter configuration, and specification of all hyper-parameters used to generate results.
- ☐ The exact number of evaluation runs.
- ☒ A description of how experiments were run.
- ☒ A clear definition of the specific measure or statistics used to report results.
- ☐ Clearly defined error bars.
- ☐ A description of results with central tendency (e.g. mean) & variation (e.g. stddev).
- ☒ A description of the computing infrastructure used.
